# Supplementary material
Source: Research Square preprint supplement (doi:10.21203/rs.3.rs-9245363/v1)

**Supplementary Figures**

Fig. S1 Explore the effects of using Neo and LaCl3 alone on hyphal growth (**A**), Ca2+ content (**B**), biomass (**C**), and DTTAs production (**D**).Within each set of experiments, asterisks and hashtags indicate significant differences according to a multiple-comparison one-way ANOVA (*P < 0.05 and **P < 0.01 vs. CK)


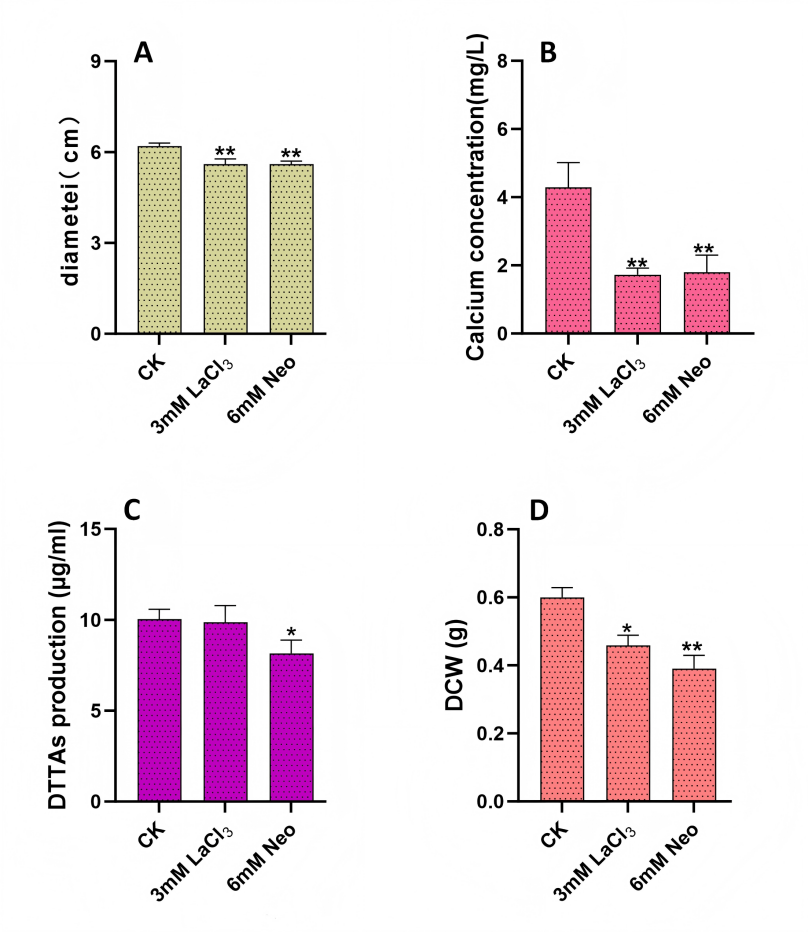


Fig. S2 Exogenous H2O2 treatment further promotes fungal biomass and DTTAs production under cobalt stress. (**A**) The effect of adding 6mM H2O2 alone on mycelial growth. (**B**) Changes in H2O2 content in UN32 hyphae treated with ROS scavenger, H2O2 or 0.28mM CoCl2. The Y-axis represents the H2O2 concentration of the H2O2 content detection kit, and the x-axis represents different treatments. (**C**) Measure the production of DTTAs after treatment with ROS scavenger, H2O2 or 0.28mM CoCl2. (**D**) Measure the biomass in mycelium treated with ROS scavenger, H2O2 or 0.28mM CoCl2.Within each set of experiments, asterisks and hashtags indicate significant differences according to a multiple-comparison one-way ANOVA (*P < 0.05 and **P < 0.01 vs. CK; #P < 0.05 vs. 0.28 mM CoCl2 group)


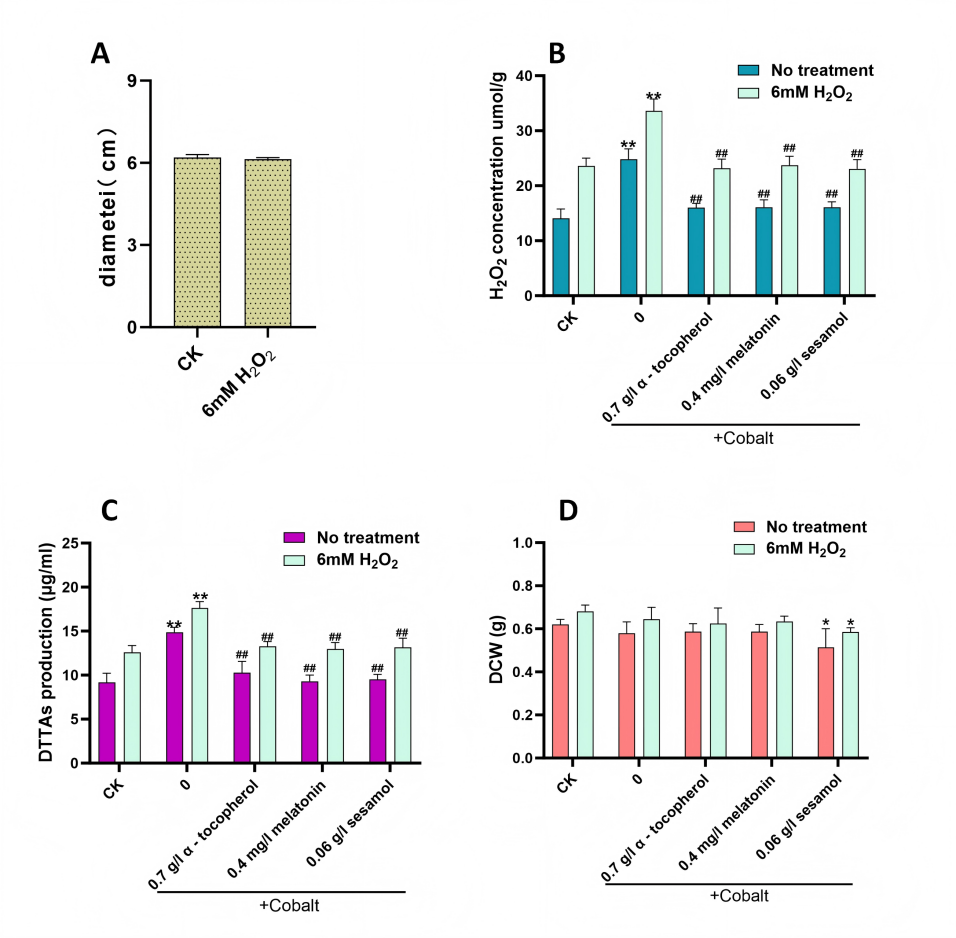

Supplement: Supplementary file 1 [file ac4140095f930b2b385f760e.docx]
